# Supplementary material for: Chemometrics-assisted HPLC-DAD as a rapid and interference-free strategy for simultaneous determination of 17 polyphenols in raw propolis
Source: Royal Society of Chemistry journal article supplement (doi:10.1039/c8ay01986j), 2018-01-01
Supplement: c8ay01986j1.pdf [file c8ay01986j1.pdf]

## SUPPLEMENTARY DATA

**Table S1**

The specific physic-chemical information of seventeen analytical polyphenols in propolis:

| No. | Compound    | Abbreviation | Molecular formula                              | Structure                                                                            | MW <sup>a</sup> | CAS NO. <sup>b</sup> |
|-----|-------------|--------------|------------------------------------------------|--------------------------------------------------------------------------------------|-----------------|----------------------|
| 1   | Catechin    | C            | C <sub>15</sub> H <sub>14</sub> O <sub>6</sub> | 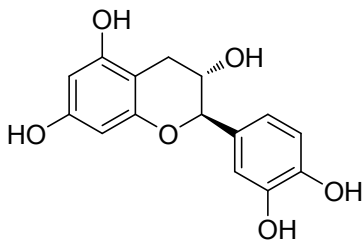   | 290.27          | 154-23-4             |
| 2   | Epicatechin | EC           | C <sub>15</sub> H <sub>14</sub> O <sub>6</sub> |    | 290.27          | 490-46-0             |
| 3   | Myricetin   | MY           | C <sub>15</sub> H <sub>10</sub> O <sub>8</sub> |   | 318.24          | 529-44-2             |
| 4   | Quercetin   | QU           | C <sub>15</sub> H <sub>10</sub> O <sub>7</sub> |  | 302.24          | 117-39-5             |
| 5   | Luteolin    | LU           | C <sub>15</sub> H <sub>10</sub> O <sub>6</sub> |  | 286.24          | 491-70-3             |
| 6   | Kaempferol  | KA           | C <sub>15</sub> H <sub>10</sub> O <sub>6</sub> |  | 286.24          | 520-18-3             |

|    |                         |              |                   |                                                                                      |        |          |
|----|-------------------------|--------------|-------------------|--------------------------------------------------------------------------------------|--------|----------|
| 7  | Apigenin                | AP           | $C_{15}H_{10}O_5$ | 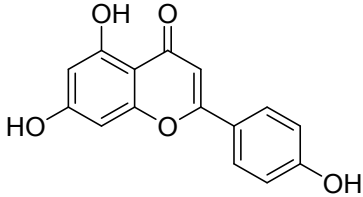   | 270.24 | 520-36-5 |
| 8  | Chrysin                 | CH           | $C_{15}H_{10}O_4$ |    | 254.24 | 480-40-0 |
| 9  | Isorhamnetin            | iso-RH       | $C_{16}H_{12}O_7$ |    | 316.26 | 480-19-3 |
| 10 | Naringenin              | NA           | $C_{15}H_{12}O_5$ |   | 272.25 | 480-41-1 |
| 11 | Hesperetin              | HE           | $C_{16}H_{14}O_6$ |  | 302.28 | 520-33-2 |
| 12 | <i>p</i> -Coumaric acid | <i>p</i> -CA | $C_9H_8O_3$       |  | 164.15 | 501-98-4 |
| 13 | Caffeic acid            | CFA          | $C_9H_8O_4$       |  | 180.16 | 331-39-5 |

|    |                  |    |                      |                                                                                      |        |           |
|----|------------------|----|----------------------|--------------------------------------------------------------------------------------|--------|-----------|
| 14 | Rutin            | RU | $C_{27}H_{30}O_{16}$ | 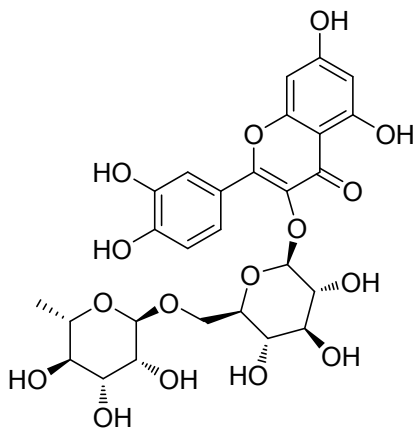   | 610.52 | 153-18-4  |
| 15 | Chlorogenic acid | CA | $C_{16}H_{18}O_9$    |    | 354.31 | 327-97-9  |
| 16 | Ferulic Acid     | FA | $C_{10}H_{10}O_4$    |   | 194.18 | 1135-24-6 |
| 17 | Taxifolin        | TF | $C_{15}H_{12}O_7$    |  | 304.25 | 480-18-2  |

<sup>a</sup> MW: molecular weight.

<sup>b</sup> CAS.NO. is from <http://www.chemicalbook.com/>.

**Table S.2** The designed concentrations levels ( $\mu\text{g mL}^{-1}$ ) of seventeen polyphenols in seven calibration samples (C01-C07) and three prediction samples (P01-P03).

| Samples NO.    | C01   | C02   | C03   | C04  | C05   | C06   | C07   | P01   | P02  | P03   |
|----------------|-------|-------|-------|------|-------|-------|-------|-------|------|-------|
| CA             | 0.86  | 3.44  | 6.02  | 8.60 | 11.18 | 13.76 | 16.34 | 12.04 | 8.60 | 5.16  |
| C              | 12.74 | 3.92  | 18.62 | 9.80 | 0.98  | 15.68 | 6.86  | 5.88  | 9.80 | 13.72 |
| EC             | 7.21  | 16.48 | 1.03  | 10.3 | 19.57 | 4.12  | 13.39 | 4.12  | 8.24 | 12.36 |
| CFA            | 7.67  | 2.36  | 11.21 | 5.90 | 0.59  | 9.44  | 4.13  | 3.54  | 2.36 | 1.18  |
| RU             | 15.39 | 12.96 | 10.53 | 8.10 | 5.67  | 3.24  | 0.81  | 9.72  | 6.48 | 3.24  |
| <i>p</i> -CA   | 0.98  | 2.24  | 0.14  | 1.40 | 2.66  | 0.56  | 1.82  | 0.84  | 0.56 | 0.28  |
| TF             | 7.54  | 2.32  | 11.02 | 5.80 | 0.58  | 9.28  | 4.06  | 6.96  | 4.64 | 2.32  |
| FA             | 2.66  | 2.24  | 1.82  | 1.40 | 0.98  | 0.56  | 0.14  | 0.28  | 0.84 | 1.40  |
| MY             | 0.94  | 3.76  | 6.58  | 9.40 | 12.22 | 15.04 | 17.86 | 3.76  | 7.52 | 11.28 |
| LU             | 7.02  | 2.16  | 10.26 | 5.40 | 0.54  | 8.64  | 3.78  | 6.48  | 4.32 | 2.16  |
| QU             | 10.64 | 8.96  | 7.28  | 5.60 | 3.92  | 2.24  | 0.56  | 4.48  | 6.72 | 2.24  |
| NA             | 0.68  | 2.72  | 4.76  | 6.80 | 8.84  | 10.88 | 12.92 | 8.16  | 5.44 | 2.72  |
| AP             | 10.27 | 3.16  | 15.01 | 7.90 | 0.79  | 12.64 | 5.53  | 3.16  | 6.32 | 9.48  |
| KA             | 5.74  | 13.12 | 0.82  | 8.20 | 15.58 | 3.28  | 10.66 | 3.28  | 6.56 | 9.84  |
| HE             | 11.57 | 3.56  | 16.91 | 8.90 | 0.89  | 14.24 | 6.23  | 10.68 | 7.12 | 3.56  |
| <i>iso</i> -RH | 14.82 | 12.48 | 10.14 | 7.80 | 5.46  | 3.12  | 0.78  | 6.42  | 9.36 | 3.12  |
| CH             | 1.22  | 10.98 | 20.74 | 30.5 | 40.26 | 50.02 | 59.78 | 18.3  | 12.2 | 6.10  |

**Table S.3** The mass spectrometry parameters applied for seventeen polyphenols related to LC-MS/MS method.

| Compound       | Retention time (min) | Dwell time (ms) | Fragmentor (V) | Collision energy (eV) | Precursor ion (m/z) | Product ion (m/z) |
|----------------|----------------------|-----------------|----------------|-----------------------|---------------------|-------------------|
| C              | 2.875                | 80              | 120            | 17                    | 289                 | 245, 203          |
| EC             | 3.232                | 80              | 120            | 17                    | 289                 | 245, 203          |
| CFA            | 3.806                | 80              | 100            | 12                    | 179                 | 135 <sup>a</sup>  |
| RU             | 4.154                | 80              | 190            | 35                    | 609                 | 300.9             |
| CA             | 4.377                | 80              | 90             | 10                    | 353                 | 191.1             |
| <i>p</i> -CA   | 5.414                | 120             | 80             | 10                    | 163                 | 119               |
| FA             | 6.120                | 120             | 90             | 12                    | 193                 | 133.8, 178.1      |
| TF             | 7.270                | 120             | 110            | 10                    | 303                 | 284.9, 125.2      |
| MY             | 8.042                | 120             | 120            | 21                    | 317                 | 179, 150.9        |
| LU             | 9.354                | 120             | 140            | 30                    | 285                 | 132.9, 175.1      |
| QU             | 9.589                | 120             | 130            | 18                    | 301                 | 151.3, 178.8      |
| AP             | 11.556               | 50              | 120            | 29                    | 269                 | 117, 151          |
| NA             | 11.790               | 50              | 120            | 20                    | 271                 | 119.1, 151.1      |
| KA             | 12.067               | 50              | 140            | 32                    | 285                 | 171.2, 116.6      |
| HE             | 12.236               | 50              | 130            | 24                    | 301                 | 163.9, 200.8      |
| <i>iso</i> -RH | 12.256               | 50              | 130            | 24                    | 315                 | 299.9, 151        |
| CH             | 13.947               | 50              | 140            | 35                    | 253                 | 119.3, 142.9      |

<sup>a</sup> Only one product ion is detected for quantification.

**Table S4** The retention time (RT), correction range, regression equation, correlation coefficient ( $R^2$ ) and lack of fit ( $RRSEMC$ ) of seventeen polyphenols in calibration set related to ATLD-assisted HPLC-DAD method.

| Compound       | RT (min) | correction range ( $\mu\text{g mL}^{-1}$ ) | Regression equation <sup>a</sup>     | $R^2$  | $RRSEMC^b$ |
|----------------|----------|--------------------------------------------|--------------------------------------|--------|------------|
| CA             | 3.86     | 0.86-16.34                                 | $y=7.87\times 10^4x-3.31\times 10^4$ | 0.9982 | 3.84%      |
| A              | 4.21     | 0.98-18.62                                 | $y=3.98\times 10^4x-3.90\times 10^3$ | 0.9996 | 1.84%      |
| EC             | 4.77     | 1.03-19.57                                 | $y=5.84\times 10^4x+1.33\times 10^4$ | 0.9996 | 1.75%      |
| CFA            | 5.58     | 0.59-11.21                                 | $y=2.42\times 10^5x-1.79\times 10^4$ | 0.9994 | 2.15%      |
| RU             | 6.08     | 0.81-15.39                                 | $y=1.35\times 10^5x+1.57\times 10^4$ | 0.9998 | 1.42%      |
| <i>p</i> -CA   | 6.91     | 0.14-2.66                                  | $y=3.98\times 10^5x-9.00\times 10^3$ | 0.9998 | 1.45%      |
| TF             | 7.11     | 0.58-11.02                                 | $y=1.78\times 10^5x-4.02\times 10^3$ | 0.9999 | 0.56%      |
| FA             | 7.23     | 0.14-2.66                                  | $y=4.02\times 10^5x+8.19\times 10^3$ | 0.9998 | 1.43%      |
| MY             | 7.84     | 0.94-17.86                                 | $y=1.29\times 10^5x-1.08\times 10^5$ | 0.9951 | 6.38%      |
| LU             | 10.05    | 0.54-10.26                                 | $y=1.61\times 10^5x-4.93\times 10^4$ | 0.9983 | 3.83%      |
| QU             | 10.13    | 0.56-10.64                                 | $y=1.20\times 10^5x+1.03\times 10^4$ | 0.9929 | 7.72%      |
| NA             | 12.24    | 0.68-12.92                                 | $y=1.27\times 10^5x+6.53\times 10^4$ | 0.9997 | 1.65%      |
| AP             | 12.37    | 0.79-15.01                                 | $y=1.99\times 10^5x-6.46\times 10^4$ | 0.9995 | 2.05%      |
| KA             | 12.84    | 0.82-15.58                                 | $y=1.90\times 10^5x-5.01\times 10^4$ | 0.9997 | 1.69%      |
| HE             | 13.16    | 0.89-16.91                                 | $y=2.03\times 10^5x-3.24\times 10^4$ | 0.9991 | 2.78%      |
| <i>iso</i> -RH | 13.37    | 0.78-14.82                                 | $y=1.98\times 10^5x-3.03\times 10^4$ | 0.9989 | 3.10%      |
| CH             | 15.69    | 1.22-59.78                                 | $y=3.28\times 10^5x-1.00\times 10^5$ | 0.9999 | 1.19%      |

<sup>a</sup> x is the concentration of analytes ( $\mu\text{g mL}^{-1}$ ) and y is the response (mAu).

<sup>b</sup>  $RRMSEC$ : relative root mean square error of calibration.  $RRMSEC = \sqrt{\frac{\sum_{n=1}^N (c_n - \hat{c}_n)^2 / (N_C - 1)}{\bar{c}}} \times 100\%$ ,  $c_n$  and  $\hat{c}_n$  are the spiked and resolved concentration in nth calibration sample, respectively.  $N_C$  is the number of calibration samples.  $\bar{c}$  is the mean concentration in calibration samples.

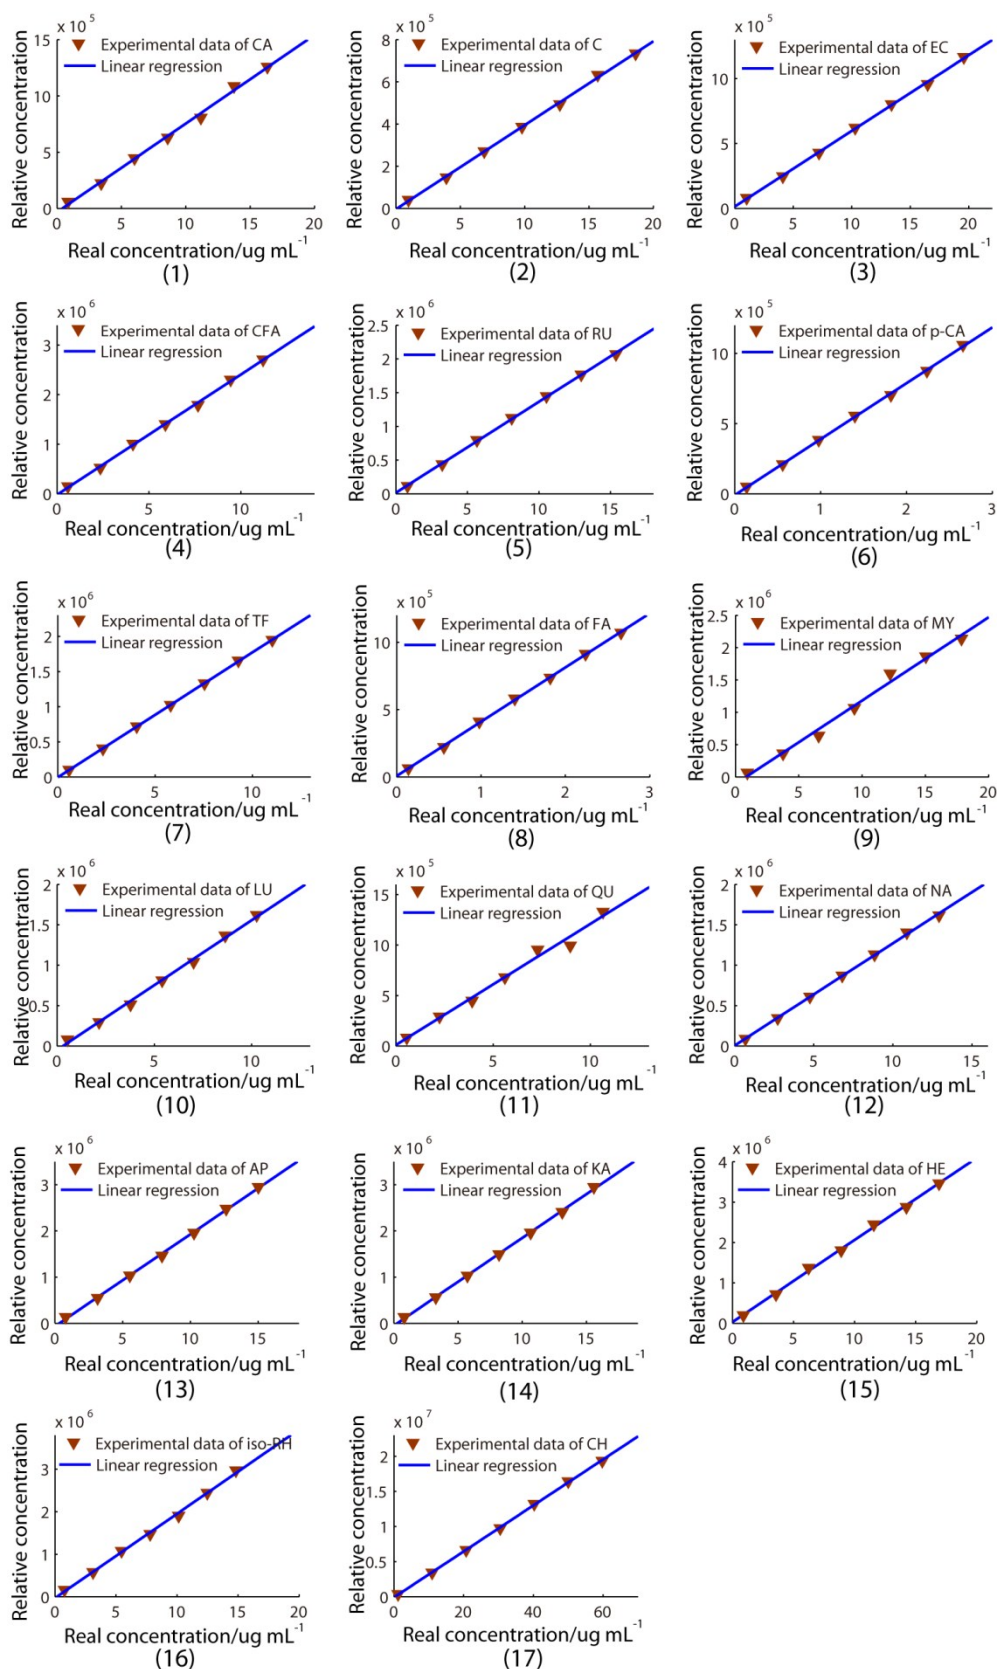

**Fig. S1** The regression curves of seventeen polyphenols using ATLD-assisted HPLC-DAD method.

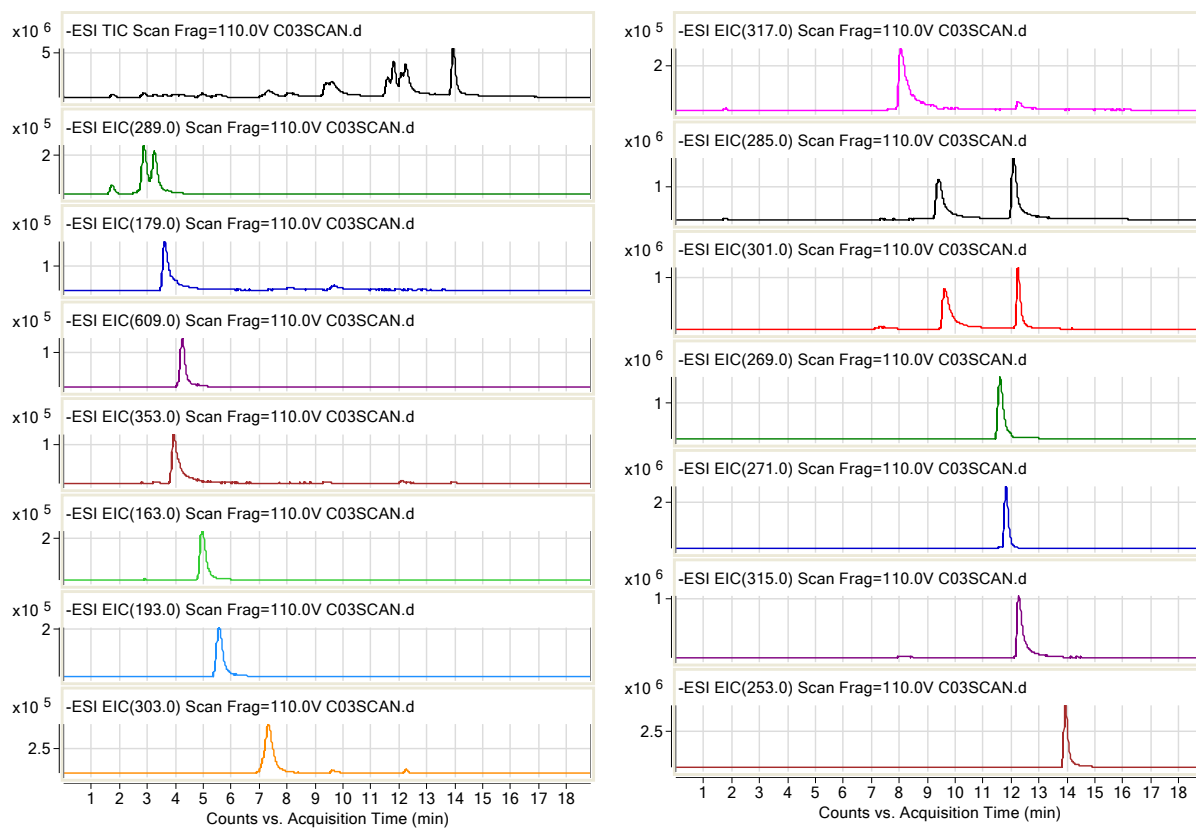

**Fig. S2** Total ion chromatograms (TIC) of seventeen polyphenols in 3th calibration sample using LC-MS/MS in negative-ion multi-reaction monitoring (MRM) mode.
